# Supplementary material for: Interfacial electronic and defect engineering coupling of S-scheme CsSnBr3/SnSx (x = 1, 2) heterostructures with carrier dynamics for solar cells
Source: Royal Society of Chemistry journal article supplement (doi:10.1039/d4ta05528d), 2024-01-01
Supplement: d4ta05528d1.pdf [file d4ta05528d1.pdf]

## Supporting Information

# Interfacial electronic and defect engineering coupling of S-scheme CsSnBr<sub>3</sub>/SnS<sub>x</sub> (x = 1, 2) heterostructures with carrier dynamics for solar cells

Minjie Zhang<sup>1</sup>, Ningning Yao<sup>1</sup>, Yanming Lin<sup>1\*</sup>, Zhenyi Jiang<sup>1\*</sup>, and Aijun Du<sup>2</sup>

<sup>1</sup>*Shaanxi Key Laboratory for Theoretical Physics Frontiers, Institute of Modern  
Physics, Northwest University, Xi'an 710127, P. R. China*

<sup>2</sup>*School of Chemistry and Physics, Queensland University of Technology, Gardens  
Point Campus,  
Brisbane, QLD 4000, Australia*

---

\* Corresponding author Tel.: 86-29-88303492, Fax: 86-29-88302331, Electronic mail: [ymlin@nwu.edu.cn](mailto:ymlin@nwu.edu.cn). (Y. Lin), [jiangzy@nwu.edu.cn](mailto:jiangzy@nwu.edu.cn). (Z. Jiang).

## Supporting Figures

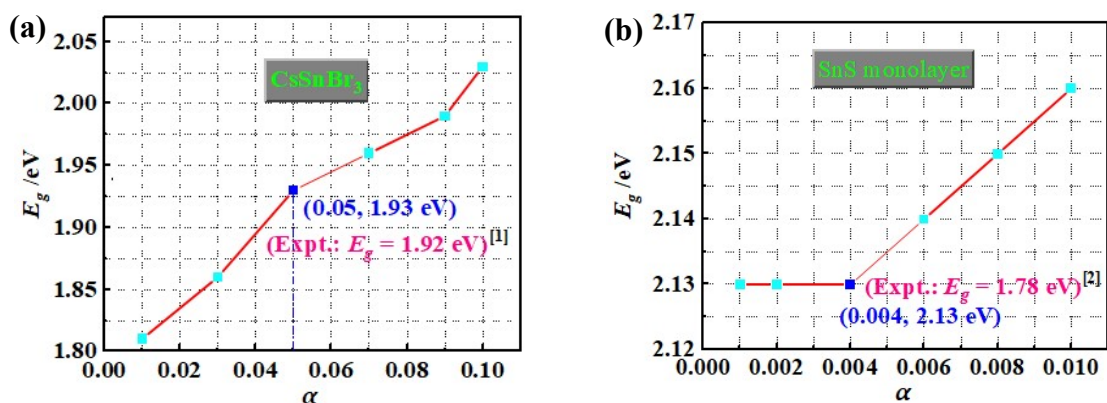

Fig. S1. The calculated band gap concerning different  $\alpha$  parameters: (a) CsSnBr<sub>3</sub> and (b) SnS monolayer.

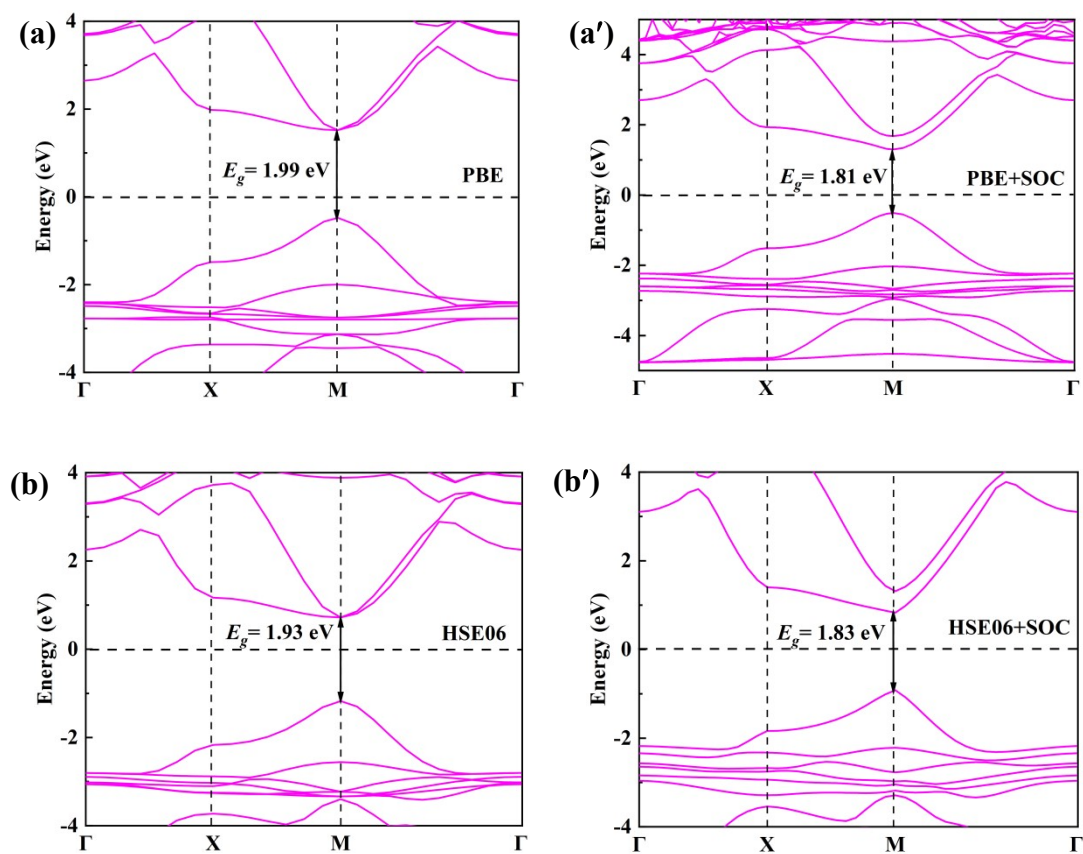

Fig. S2. Calculated band structures of the CsSnBr<sub>3</sub> bulk using (a) GGA-PBE, (b) GGA-PBE + SOC, (c) HSE06 functional and (d) HSE06 functional + SOC.

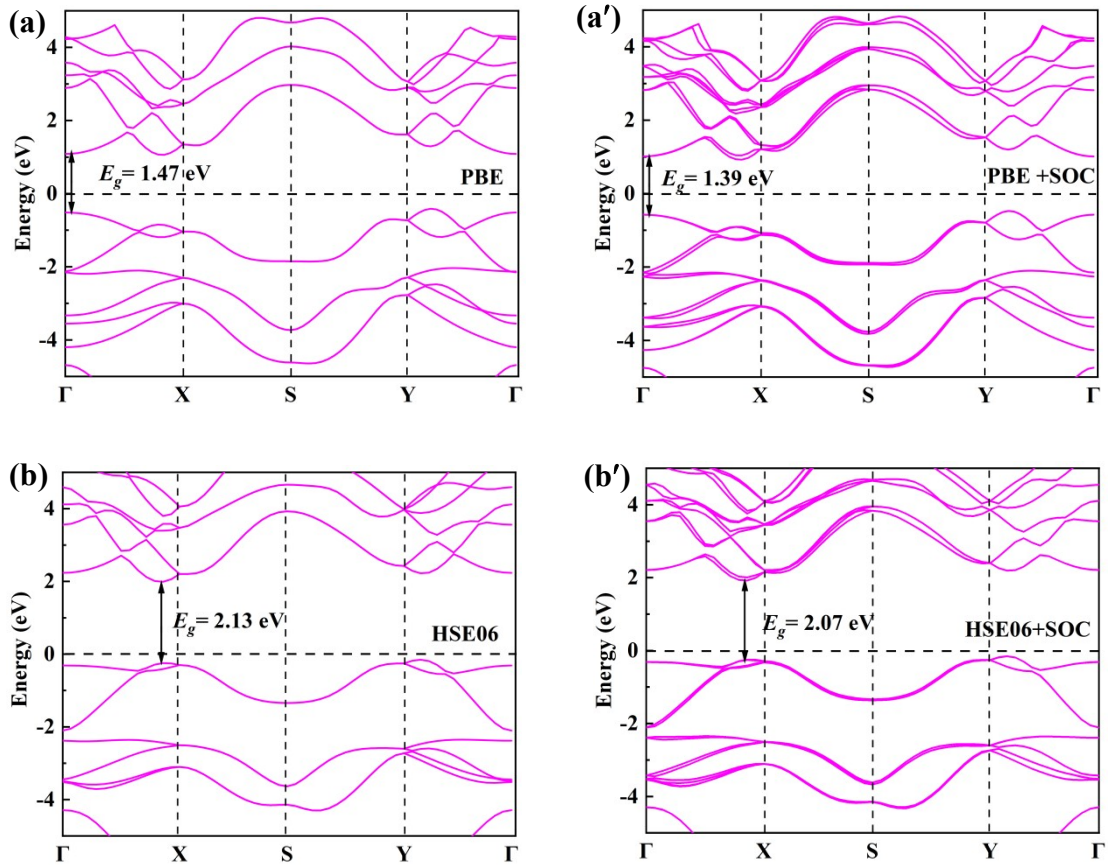

**Fig. S3.** Calculated band structures of the SnS monolayer using (a) GGA-PBE, (b) GGA-PBE + SOC, (c) HSE06 functional and (d) HSE06 functional + SOC.

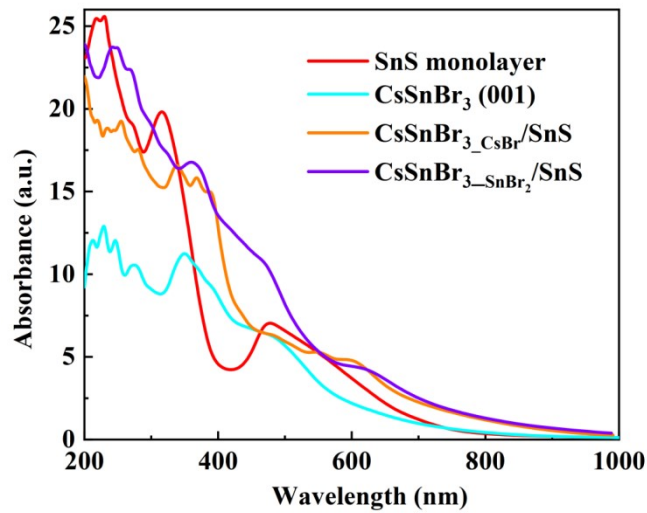

**Fig. S4.** Calculated optical absorption of SnS monolayer, CsSnBr<sub>3</sub> (001), CsSnBr<sub>3</sub>/SnS heterostructure (with CsBr terminal) and CsSnBr<sub>3</sub>/SnS heterostructure (with SnBr<sub>2</sub> terminal).

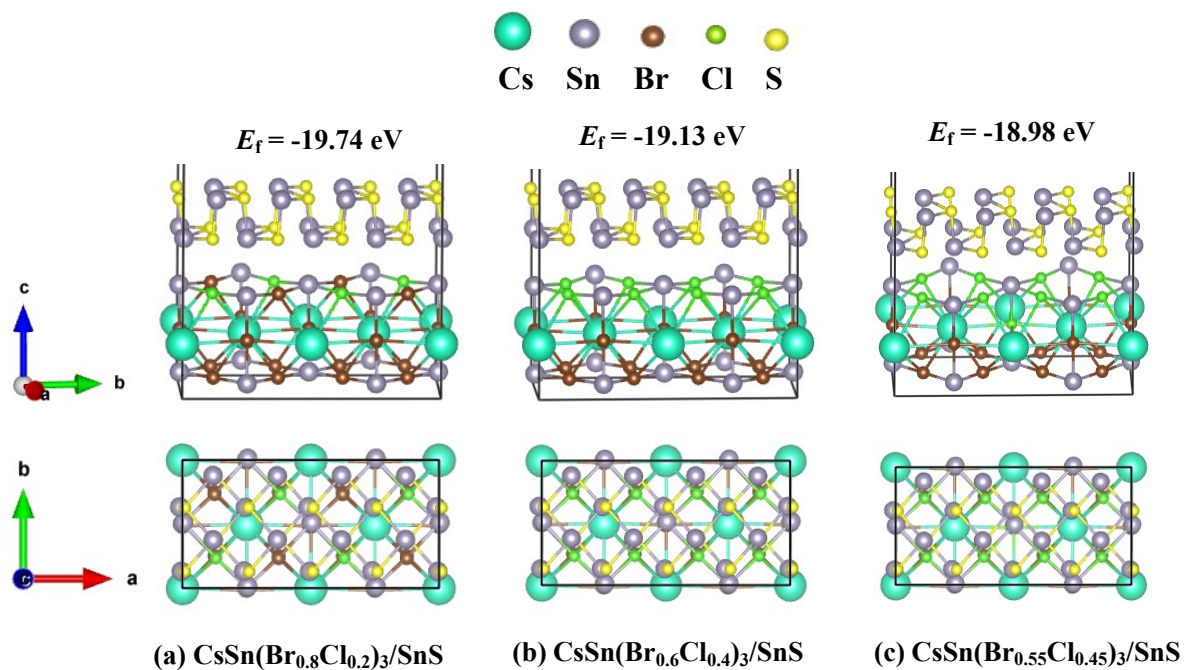

**Fig. S5.** Optimized crystal structure: top view and side view of the (a) CsSn(Br<sub>0.8</sub>Cl<sub>0.2</sub>)<sub>3</sub>/SnS, (b) CsSn(Br<sub>0.6</sub>Cl<sub>0.4</sub>)<sub>3</sub>/SnS, (c) CsSn(Br<sub>0.55</sub>Cl<sub>0.45</sub>)<sub>3</sub>/SnS heterostructure, (cyan, gray, brown, green, and yellow represent the Cs, Sn, Br, Cl, and S atoms).

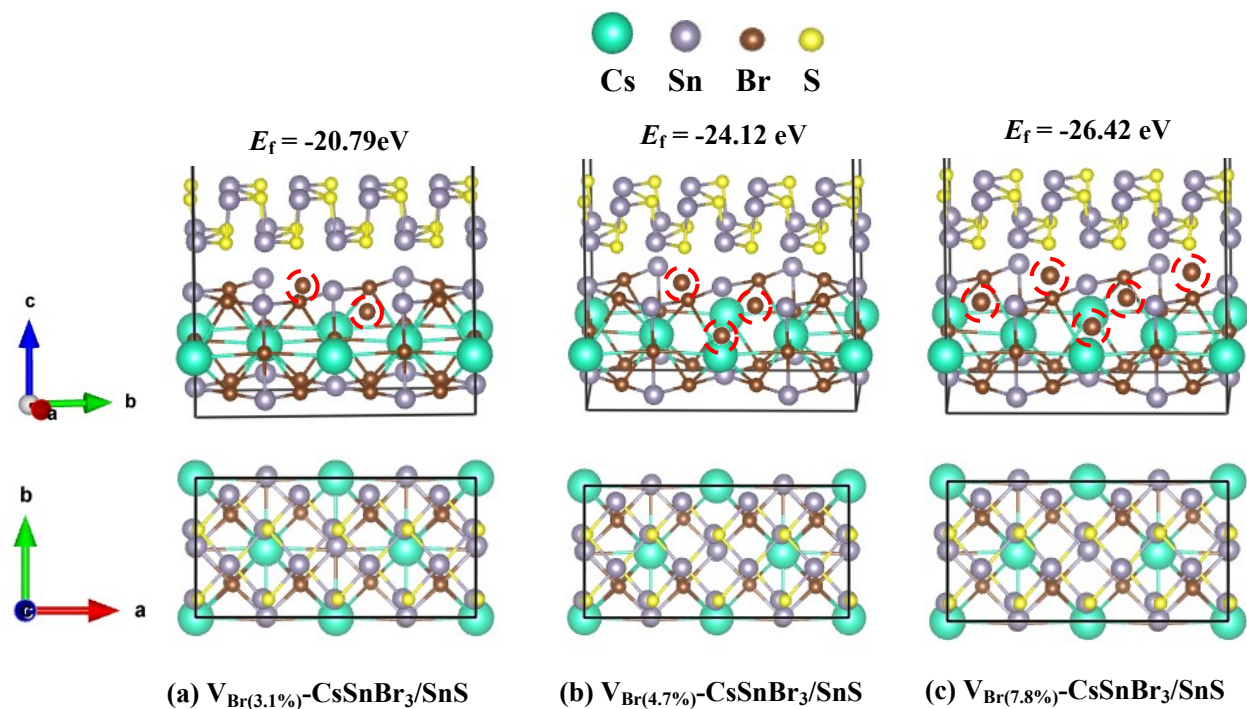

**Fig. S6.** Optimized crystal structure: top view and side view of the (a) V<sub>Br(3.1%)</sub>-CsSnBr<sub>3</sub>/SnS, (b) V<sub>Br(4.7%)</sub>-CsSnBr<sub>3</sub>/SnS, (c) V<sub>Br(7.8%)</sub>-CsSnBr<sub>3</sub>/SnS heterostructure, (cyan, gray, brown, and yellow represent the Cs, Sn, Br, and S atoms).

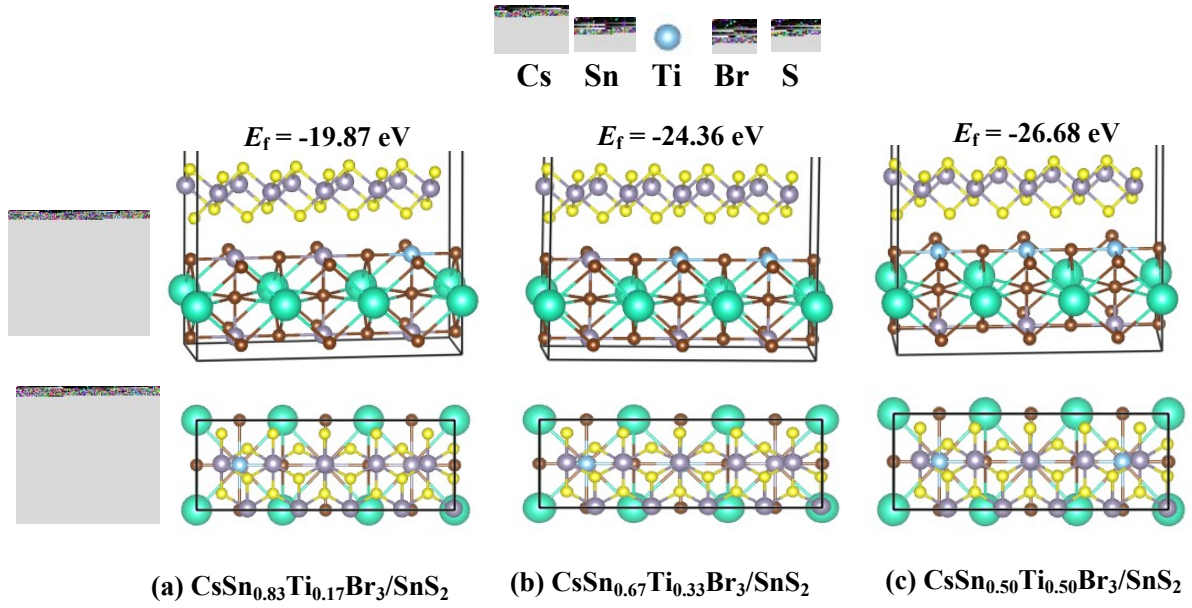

**Fig. S7.** Optimized crystal structure: top view and side view of the (a)  $\text{CsSn}_{0.83}\text{Ti}_{0.17}\text{Br}_3/\text{SnS}_2$ , (b)  $\text{CsSn}_{0.67}\text{Ti}_{0.33}\text{Br}_3/\text{SnS}_2$ , (c)  $\text{CsSn}_{0.50}\text{Ti}_{0.50}\text{Br}_3/\text{SnS}_2$  heterostructure, (cyan, gray, sky blue, brown, and yellow represent the Cs, Sn, Ti, Br, and S atoms).

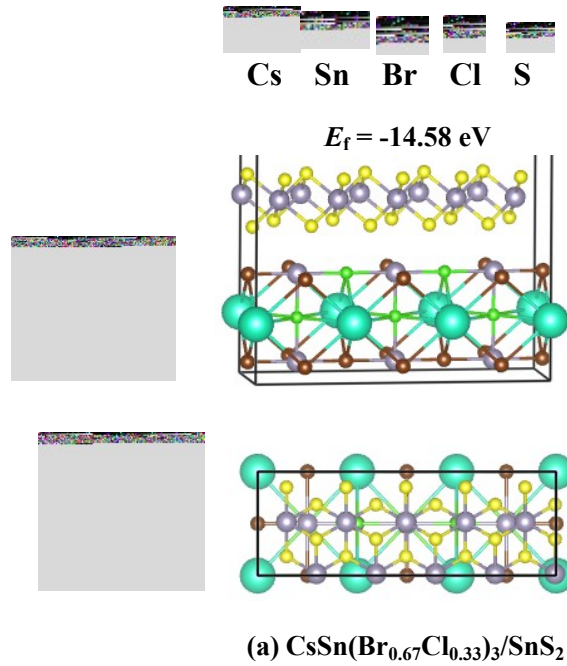

**Fig. S8.** Optimized crystal structure: top view and side view of (a)  $\text{CsSn}(\text{Br}_{0.67}\text{Cl}_{0.33})_3/\text{SnS}_2$  heterostructure, (cyan, gray, brown, green and yellow represent the Cs, Sn, Br, Cl and S atoms).

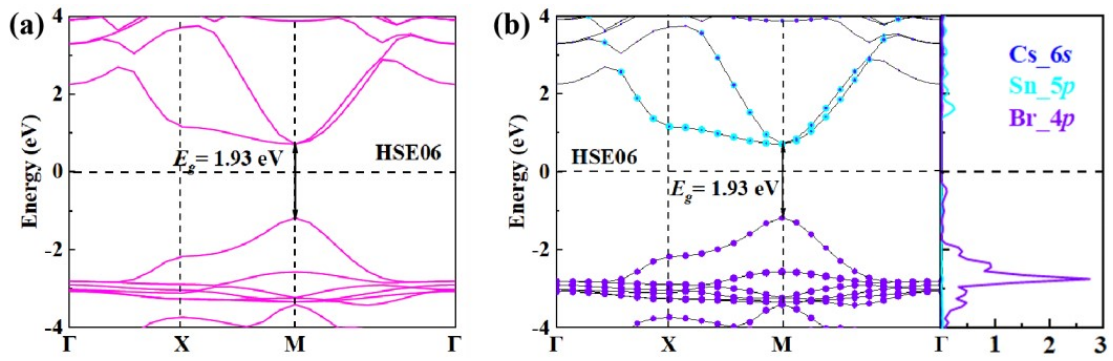

**Fig. S9** Calculated: (a) band structure, (b) Projected band structure and PDOS based on HSE06 functional of the CsSnBr<sub>3</sub> bulk. The Fermi level is set to 0 eV by a horizontal black dashed line.

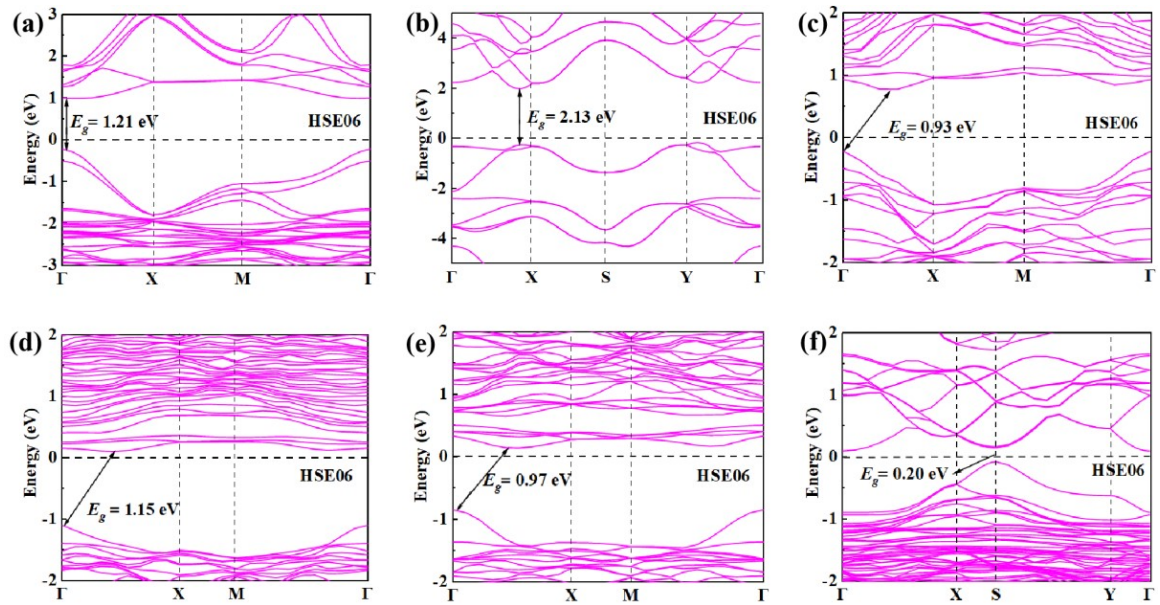

**Fig. S10** Calculated band structure: (a) CsSnBr<sub>3</sub> (001), (b) SnS monolayer, (c) CsSnBr<sub>3</sub>/SnS, (d) CsSn<sub>0.875</sub>Ti<sub>0.125</sub>Br<sub>3</sub>/SnS, (e) V<sub>Br(6.3%)</sub>-CsSnBr<sub>3</sub>/SnS, and (f) CsSn(Br<sub>0.87</sub>Cl<sub>0.13</sub>)<sub>3</sub>/SnS<sub>2</sub> heterostructure. The Fermi level is set to 0 eV by a horizontal black dashed line.

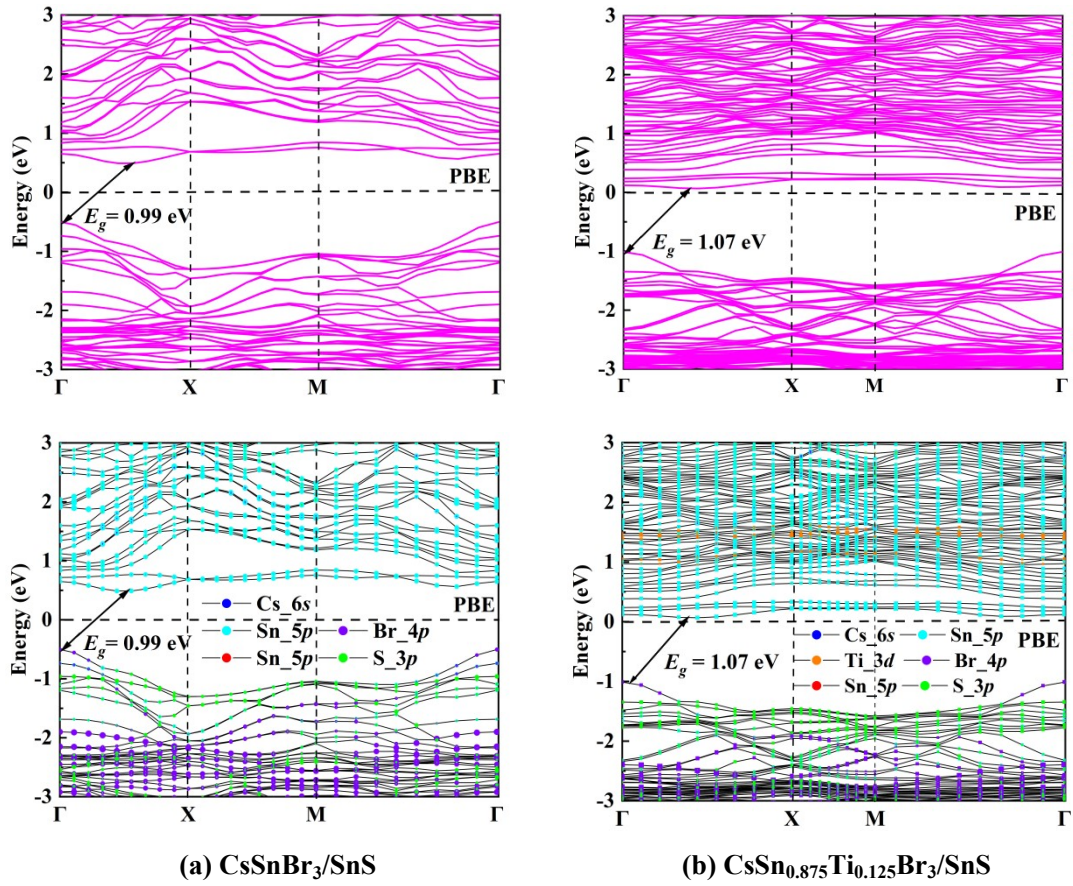

**Fig. S11** Calculated band structure and Projected band structure: (a) CsSnBr<sub>3</sub>/SnS, (b) CsSn<sub>0.875</sub>Ti<sub>0.125</sub>Br<sub>3</sub>/SnS heterostructure with GGA-PBE. The Fermi level is set to 0 eV by a horizontal black dashed line.

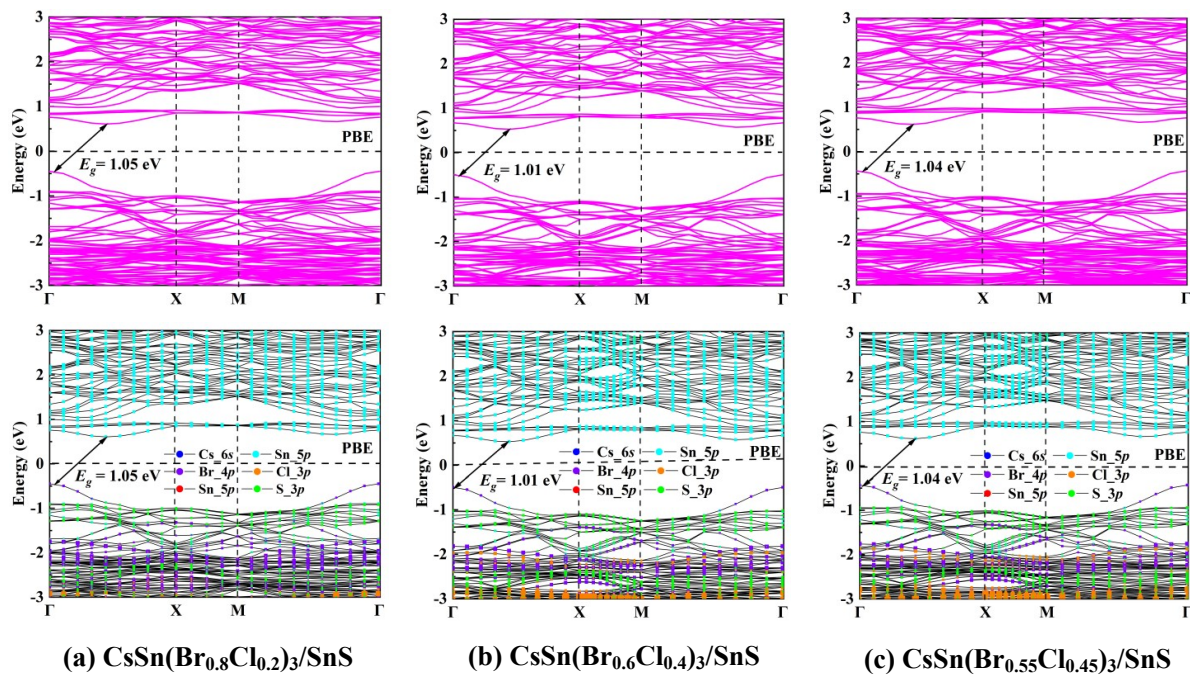

**Fig. S12** Calculated band structure and Projected band structure: (a)  $\text{CsSn}(\text{Br}_{0.8}\text{Cl}_{0.2})_3/\text{SnS}$ , (b)  $\text{CsSn}(\text{Br}_{0.6}\text{Cl}_{0.4})_3/\text{SnS}$ , (c)  $\text{CsSn}(\text{Br}_{0.55}\text{Cl}_{0.45})_3/\text{SnS}$  heterostructure with GGA-PBE. The Fermi level is set to 0 eV by a horizontal black dashed line.



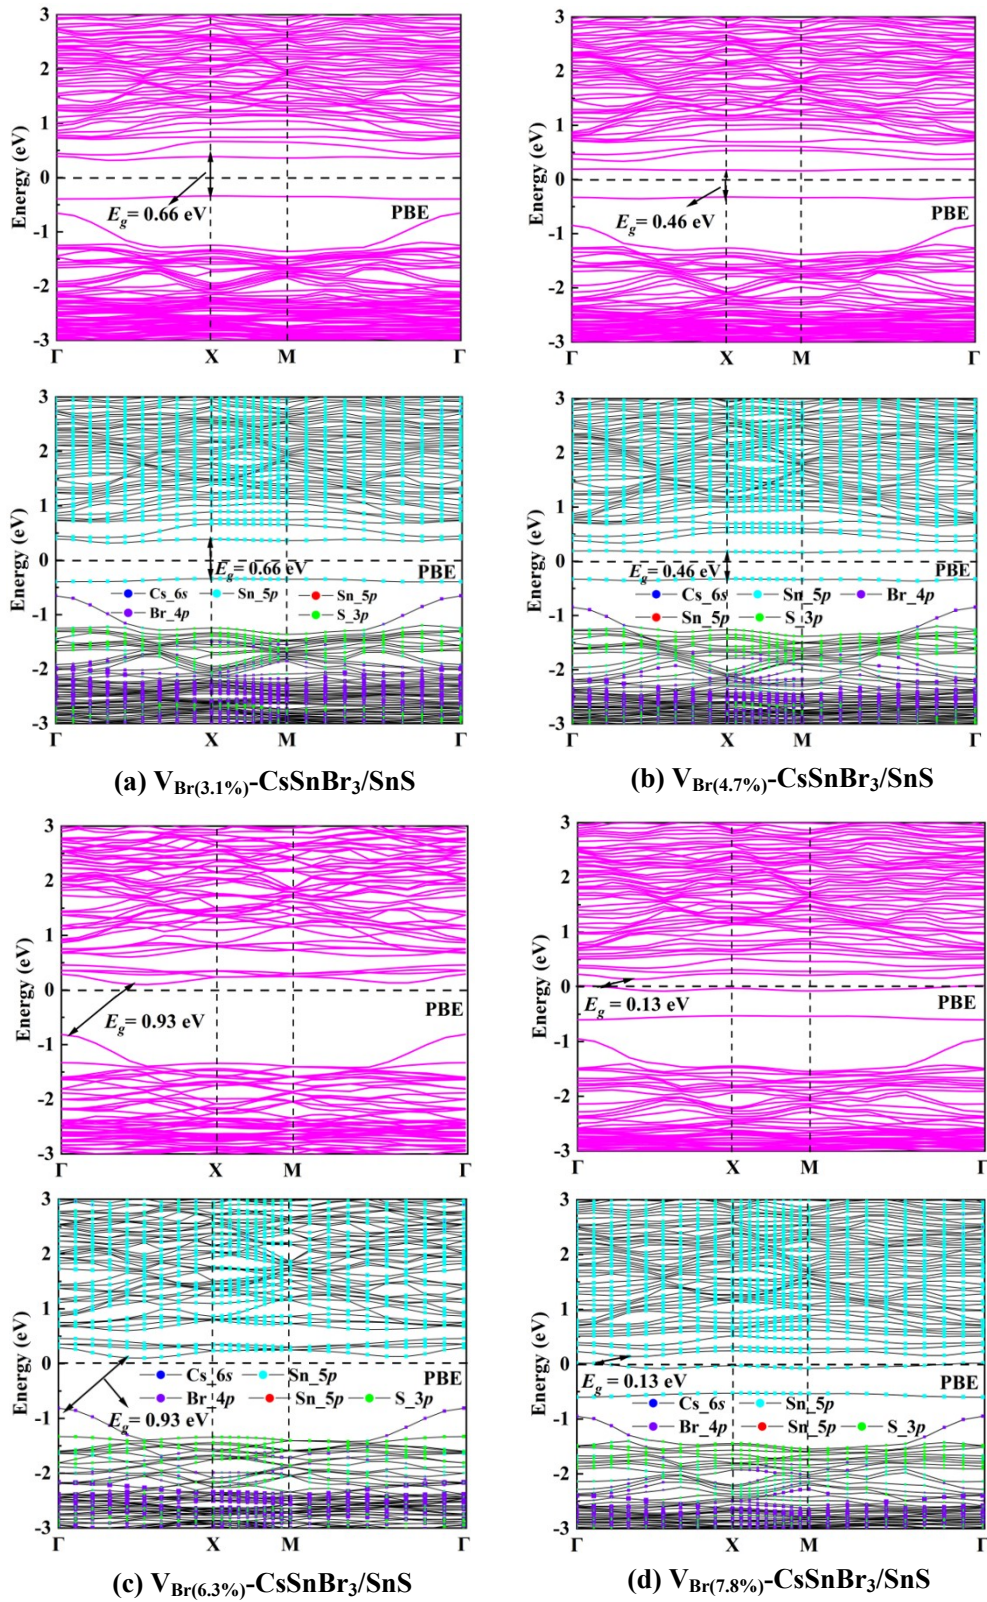

**Fig. S13** Calculated band structure and Projected band structure: (a)  $V_{\text{Br}(3.1\%)}\text{-CsSnBr}_3/\text{SnS}$ , (b)  $V_{\text{Br}(4.7\%)}\text{-CsSnBr}_3/\text{SnS}$ , (c)  $V_{\text{Br}(6.3\%)}\text{-CsSnBr}_3/\text{SnS}$ , (d)  $V_{\text{Br}(7.8\%)}\text{-CsSnBr}_3/\text{SnS}$  heterostructure with GGA-PBE. The Fermi level is set to 0 eV by a horizontal black dashed line.

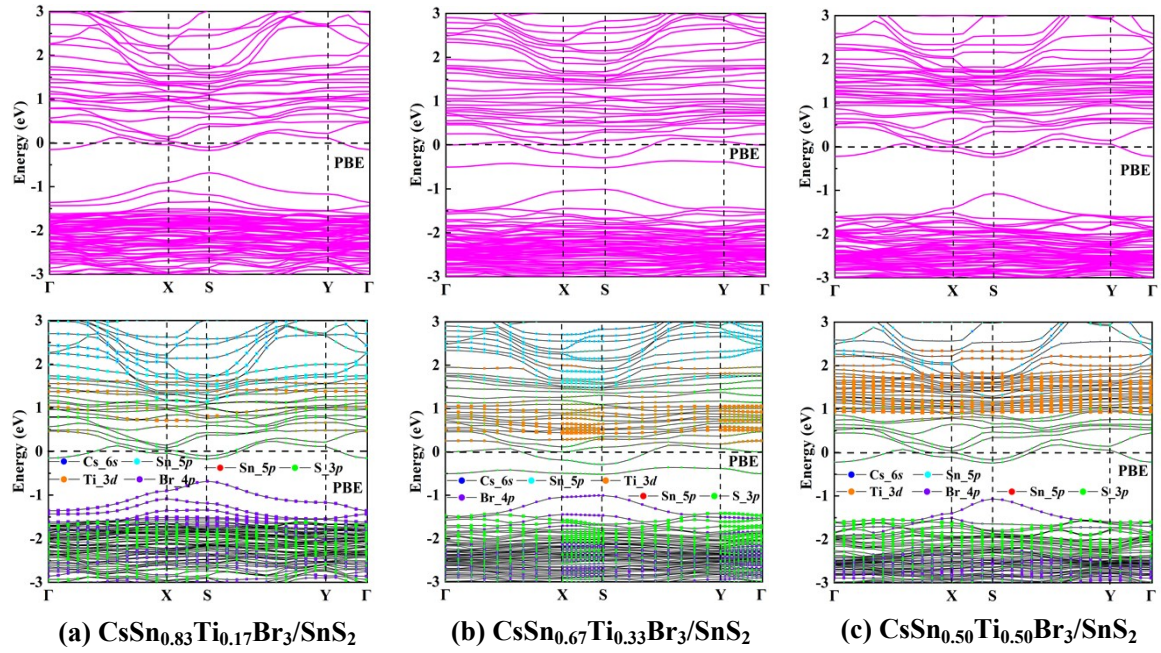

**Fig. S14** Calculated band structure and Projected band structure: (a)  $\text{CsSn}_{0.83}\text{Ti}_{0.17}\text{Br}_3/\text{SnS}_2$ , (b)  $\text{CsSn}_{0.67}\text{Ti}_{0.33}\text{Br}_3/\text{SnS}_2$ , (c)  $\text{CsSn}_{0.50}\text{Ti}_{0.50}\text{Br}_3/\text{SnS}_2$  heterostructure with GGA-PBE. The Fermi level is set to 0 eV by a horizontal black dashed line.

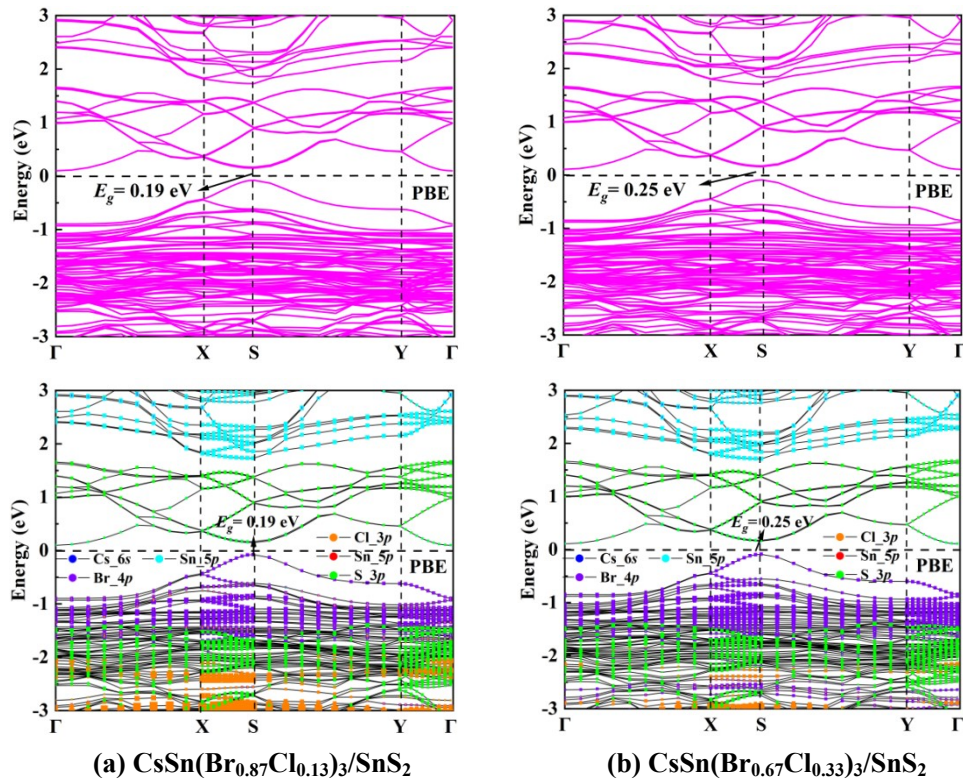

**Fig. S15** Calculated band structure and Projected band structure: (a)  $\text{CsSn}(\text{Br}_{0.87}\text{Cl}_{0.13})_3/\text{SnS}_2$ , (b)  $\text{CsSn}(\text{Br}_{0.67}\text{Cl}_{0.33})_3/\text{SnS}_2$  heterostructure with GGA-PBE. The Fermi level is set to 0 eV by a horizontal black dashed line.

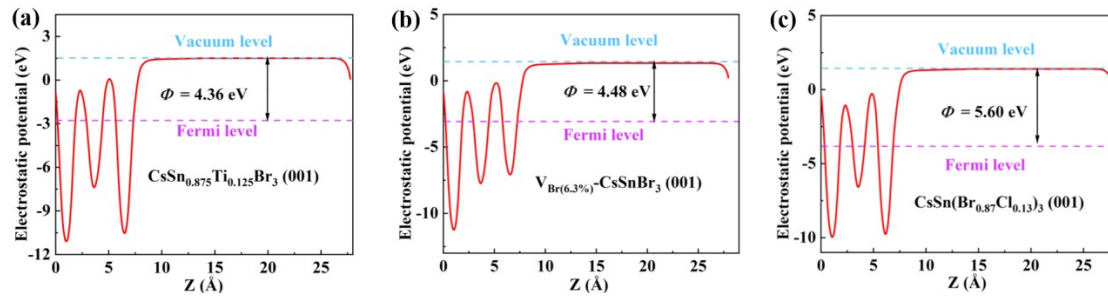

**Fig. S16** Work function of (a)  $\text{CsSn}_{0.875}\text{Ti}_{0.125}\text{Br}_3$  (001) surface, (b)  $\text{V}_{\text{Br}(6.3\%)}\text{-CsSnBr}_3$  (001) surface, and (c)  $\text{CsSn}(\text{Br}_{0.87}\text{Cl}_{0.13})_3$  (001) surface.

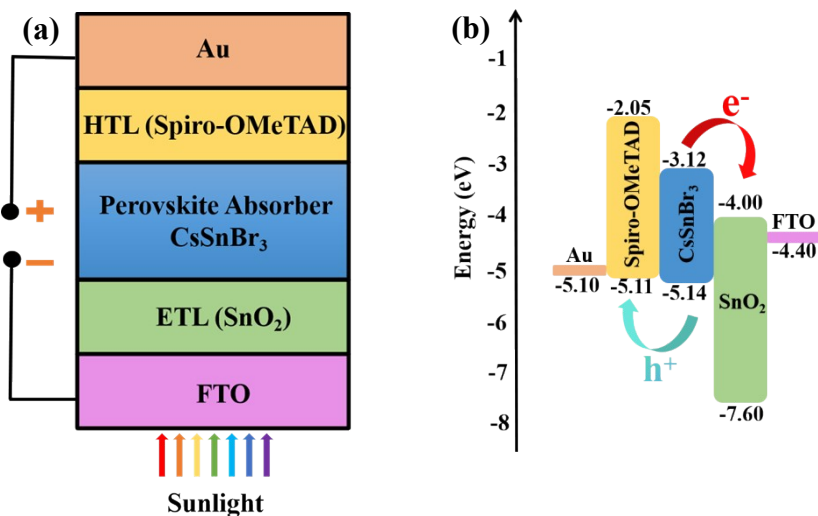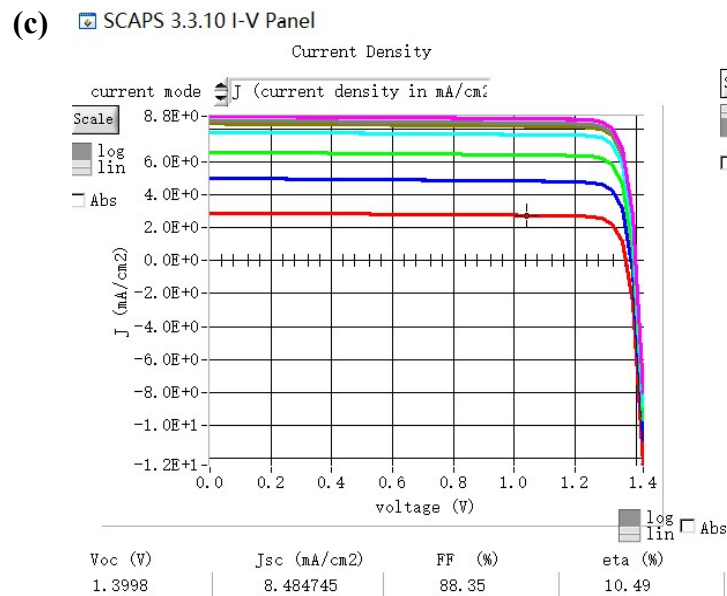

**Fig. S17** Device structure of the (a)  $\text{CsSnBr}_3$  perovskite solar cell, (b) Energy level diagram of the  $\text{CsSnBr}_3$  perovskite device (FTO/ $\text{SnO}_2$ / $\text{CsSnBr}_3$ /Spiro-OMeTAD/Au), and (c) Simulated results ( $V_{\text{oc}}$ ,  $J_{\text{sc}}$ , FF, and PCE).

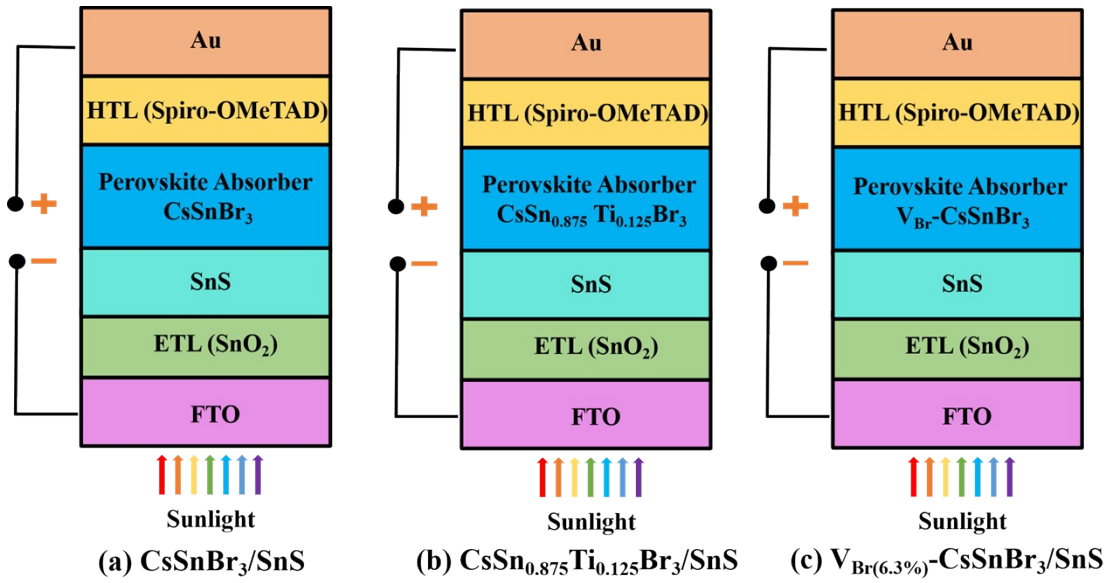

**Fig. S18** Solar cells device structure of the (a)  $\text{CsSnBr}_3/\text{SnS}$ , (b)  $\text{CsSn}_{0.875}\text{Ti}_{0.125}\text{Br}_3/\text{SnS}$ , and (c)  $\text{V}_{\text{Br}(6.3\%)}\text{-CsSnBr}_3/\text{SnS}$  heterostructure.

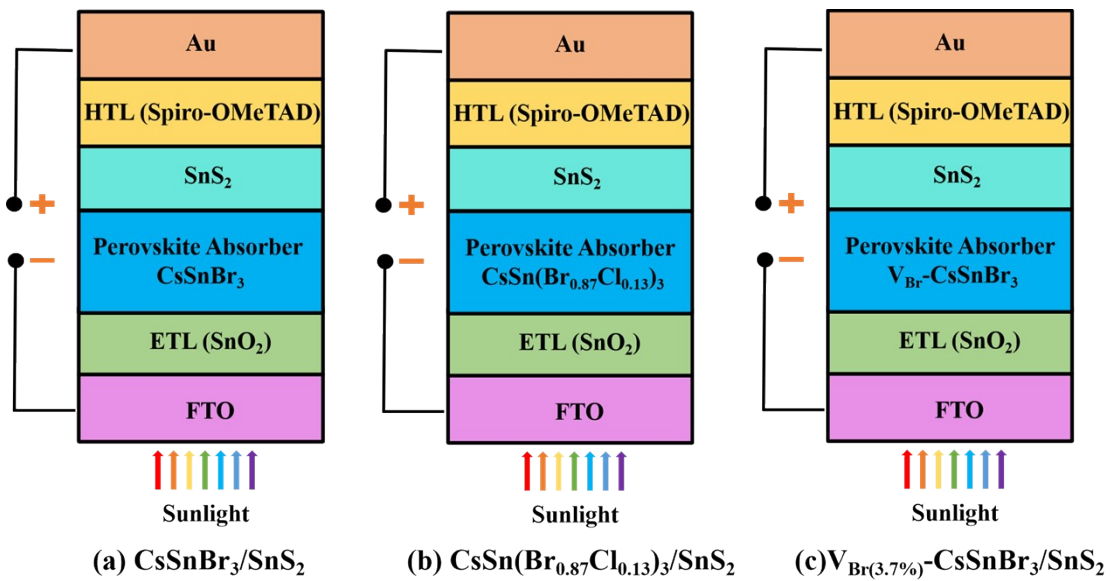

**Fig. S19** Solar cells device structure of the (a)  $\text{CsSnBr}_3/\text{SnS}_2$ , (b)  $\text{CsSn}(\text{Br}_{0.87}\text{Cl}_{0.13})_3/\text{SnS}_2$ , and (c)  $\text{V}_{\text{Br}(3.7\%)}\text{-CsSnBr}_3/\text{SnS}_2$  heterostructure.

**Table S1.** Input parameters of the Electron transfer layer, Hole transfer layer, and FTO.

| Parameters                                                | SnO <sub>2</sub> [3] | Spiro-<br>OMeTAD <sup>4</sup> | FTO [5]              |
|-----------------------------------------------------------|----------------------|-------------------------------|----------------------|
| Thickness (nm)                                            | 100                  | 200                           | 100                  |
| $E_g$ (eV)                                                | 3.50                 | 3.00                          | 3.50                 |
| Electron Affinity, $\chi$ (eV)                            | 4.00                 | 2.45                          | 4.00                 |
| Relative permittivity, $\epsilon_r$                       | 9.00                 | 3.00                          | 9.00                 |
| Effective CB density of states, $N_c$ (cm <sup>-3</sup> ) | $2.2 \times 10^{18}$ | $2.2 \times 10^{18}$          | $2.0 \times 10^{18}$ |
| Effective VB density of states, $N_v$ (cm <sup>-3</sup> ) | $2.2 \times 10^{18}$ | $1.9 \times 10^{19}$          | $1.8 \times 10^{19}$ |
| Electron mobility, $\mu_n$ (cm <sup>2</sup> /Vs)          | 20                   | 100                           | 20                   |
| Hole mobility, $\mu_p$ (cm <sup>2</sup> /Vs)              | 10                   | 100                           | 10                   |
| Electron Thermal Velocity (cm/s)                          | $1.0 \times 10^{17}$ | $1.0 \times 10^{17}$          | $1.0 \times 10^{17}$ |
| Hole Thermal Velocity (cm/s)                              | $1.0 \times 10^{17}$ | $1.0 \times 10^{17}$          | $1.0 \times 10^{17}$ |
| Donor concentration, $N_D$ (cm <sup>-3</sup> )            | $1.0 \times 10^{17}$ | 0                             | $1.0 \times 10^{15}$ |
| Acceptor concentration, $N_A$ (cm <sup>-3</sup> )         | 0                    | $2.0 \times 10^{19}$          | 0                    |
| Defect density, $N_t$ (1/cm <sup>3</sup> )                | $1.0 \times 10^{15}$ | $1.0 \times 10^{15}$          | $1.0 \times 10^{15}$ |

**Table S2.** Input parameters of the CsSnBr<sub>3</sub> absorber layer, SnS absorber layer, and SnS<sub>2</sub> absorber layer.

| Parameters                                                | CsSnBr <sub>3</sub> <sup>[6]</sup> | SnS <sup>[7]</sup>    | SnS <sub>2</sub> <sup>[8]</sup> |
|-----------------------------------------------------------|------------------------------------|-----------------------|---------------------------------|
| Thickness (nm)                                            | 470                                | 400                   | 400                             |
| $E_g$ (eV)                                                | 0.20-1.15                          | 2.13                  | 2.13                            |
| Electron Affinity, $\chi$ (eV)                            | 4.07                               | 4.20                  | 4.24                            |
| Relative permittivity, $\epsilon_r$                       | 5.90                               | 13.00                 | 10.00                           |
| Effective CB density of states, $N_C$ (cm <sup>-3</sup> ) | $1.0 \times 10^{19}$               | $1.18 \times 10^{18}$ | $2.2 \times 10^{18}$            |
| Effective VB density of states, $N_V$ (cm <sup>-3</sup> ) | $1.0 \times 10^{19}$               | $4.76 \times 10^{18}$ | $1.8 \times 10^{19}$            |
| Electron mobility, $\mu_n$ (cm <sup>2</sup> /Vs)          | 2                                  | 30                    | 500                             |
| Hole mobility, $\mu_p$ (cm <sup>2</sup> /Vs)              | 2                                  | 9.4                   | 500                             |
| Electron Thermal Velocity (cm/s)                          | $1.0 \times 10^{17}$               | $1.0 \times 10^{17}$  | $1.0 \times 10^{17}$            |
| Hole Thermal Velocity (cm/s)                              | $1.0 \times 10^{17}$               | $1.0 \times 10^{17}$  | $1.0 \times 10^{17}$            |
| Donor concentration, $N_D$ (cm <sup>-3</sup> )            | 0                                  | $1.0 \times 10^{17}$  | $1.0 \times 10^{17}$            |
| Acceptor concentration, $N_A$ (cm <sup>-3</sup> )         | $1.0 \times 10^{15}$               | 0                     | 0                               |
| Defect density, $N_t$ (1/cm <sup>3</sup> )                | $1.0 \times 10^{15}$               | $1.0 \times 10^{15}$  | $1.0 \times 10^{15}$            |

## CsSnBr<sub>3</sub> CIF

data\_CONTCAR

\_audit\_creation\_date 2024-01-17  
\_audit\_creation\_method 'Materials Studio'  
\_symmetry\_space\_group\_name\_H-M 'P1'  
\_symmetry\_Int\_Tables\_number 1  
\_symmetry\_cell\_setting triclinic

loop\_

\_symmetry\_equiv\_pos\_as\_xyz  
x,y,z  
\_cell\_length\_a 5.8484  
\_cell\_length\_b 5.8484  
\_cell\_length\_c 5.8484  
\_cell\_angle\_alpha 90.0000  
\_cell\_angle\_beta 90.0000  
\_cell\_angle\_gamma 90.0000

loop\_

\_atom\_site\_label  
\_atom\_site\_type\_symbol  
\_atom\_site\_fract\_x  
\_atom\_site\_fract\_y  
\_atom\_site\_fract\_z  
\_atom\_site\_U\_iso\_or\_equiv  
\_atom\_site\_adp\_type  
\_atom\_site\_occupancy

|     |    |         |         |         |         |      |      |
|-----|----|---------|---------|---------|---------|------|------|
| Cs1 | Cs | 0.00000 | 0.00000 | 0.00000 | 0.01267 | Uiso | 1.00 |
| Sn1 | Sn | 0.50000 | 0.50000 | 0.50000 | 0.01267 | Uiso | 1.00 |
| Br1 | Br | 0.00000 | 0.50000 | 0.50000 | 0.01267 | Uiso | 1.00 |
| Br2 | Br | 0.50000 | 0.00000 | 0.50000 | 0.01267 | Uiso | 1.00 |
| Br3 | Br | 0.50000 | 0.50000 | 0.00000 | 0.01267 | Uiso | 1.00 |

## SnS CIF

```
data_SnS
_audit_creation_date      2024-08-27
_audit_creation_method    'Materials Studio'
_symmetry_space_group_name_H-M  'PMCN'
_symmetry_Int_Tables_number  62
_symmetry_cell_setting    orthorhombic
loop_
_symmetry_equiv_pos_as_xyz
  x,y,z
  -x,y+1/2,-z+1/2
  x+1/2,-y,-z
  -x+1/2,-y+1/2,z+1/2
  -x,-y,-z
  x,-y+1/2,z+1/2
  -x+1/2,y,z
  x+1/2,y+1/2,-z+1/2
_cell_length_a            3.9900
_cell_length_b            4.3400
_cell_length_c            11.2000
_cell_angle_alpha         90.0000
_cell_angle_beta          90.0000
_cell_angle_gamma         90.0000
loop_
_atom_site_label
_atom_site_type_symbol
_atom_site_fract_x
_atom_site_fract_y
_atom_site_fract_z
_atom_site_U_iso_or_equiv
_atom_site_adp_type
_atom_site_occupancy
Sn1    Sn    0.25000  0.11500  0.11800  0.00000  Uiso  1.00
S1     S     0.75000  0.52200  0.15000  0.00000  Uiso  1.00
```



## SnS<sub>2</sub> CIF

data\_SnS2  
\_audit\_creation\_date 2024-08-27  
\_audit\_creation\_method 'Materials Studio'  
\_symmetry\_space\_group\_name\_H-M 'P1'  
\_symmetry\_Int\_Tables\_number 1  
\_symmetry\_cell\_setting triclinic  
loop\_  
\_symmetry\_equiv\_pos\_as\_xyz  
  x,y,z  
\_cell\_length\_a 3.6758  
\_cell\_length\_b 3.6758  
\_cell\_length\_c 12.3389  
\_cell\_angle\_alpha 90.0000  
\_cell\_angle\_beta 90.0000  
\_cell\_angle\_gamma 120.0000  
loop\_  
\_atom\_site\_label  
\_atom\_site\_type\_symbol  
\_atom\_site\_fract\_x  
\_atom\_site\_fract\_y  
\_atom\_site\_fract\_z  
\_atom\_site\_U\_iso\_or\_equiv  
\_atom\_site\_adp\_type  
\_atom\_site\_occupancy  
Sn0 Sn 0.33333 0.66667 0.62501 0.00000 Uiso 1.00  
Sn1 Sn 0.66667 0.33333 0.12501 0.00000 Uiso 1.00  
S2 S 0.66667 0.33333 0.74340 0.00000 Uiso 1.00  
S3 S 0.33333 0.66667 0.24340 0.00000 Uiso 1.00  
S4 S 0.00000 0.00000 0.00659 0.00000 Uiso 1.00  
S5 S 0.00000 0.00000 0.50659 0.00000 Uiso 1.00

## CsSnBr<sub>3</sub>/SnS heterostructure CIF

```
data_CsSnBr3SnS
_audit_creation_date      2024-08-27
_audit_creation_method    'Materials Studio'
_symmetry_space_group_name_H-M  'P1'
_symmetry_Int_Tables_number  1
_symmetry_cell_setting    triclinic
loop_
_symmetry_equiv_pos_as_xyz
  x,y,z
_cell_length_a            8.2474
_cell_length_b            16.6240
_cell_length_c            32.9157
_cell_angle_alpha         90.0000
_cell_angle_beta          90.0000
_cell_angle_gamma         90.0000
loop_
_atom_site_label
_atom_site_type_symbol
_atom_site_fract_x
_atom_site_fract_y
_atom_site_fract_z
_atom_site_U_iso_or_equiv
_atom_site_adp_type
_atom_site_occupancy
Sn1  Sn  0.00000  0.25000  0.03038  0.01267  Uiso  1.00
Sn2  Sn  0.50000  0.00000  0.03038  0.01267  Uiso  1.00
Sn3  Sn  0.01385  0.24550  0.20385  0.01267  Uiso  1.00
Sn4  Sn  0.51385  0.49550  0.20385  0.01267  Uiso  1.00
Sn5  Sn  0.13015  0.00459  0.30019  0.01267  Uiso  1.00
Sn6  Sn  0.13370  0.26059  0.30081  0.01267  Uiso  1.00
Sn7  Sn  0.63370  0.01059  0.30081  0.01267  Uiso  1.00
Sn8  Sn  0.63015  0.25459  0.30019  0.01267  Uiso  1.00
Sn9  Sn  0.37938  0.13041  0.38810  0.01267  Uiso  1.00
Sn10 Sn  0.37663  0.38034  0.38846  0.01267  Uiso  1.00
Sn11 Sn  0.87663  0.13034  0.38846  0.01267  Uiso  1.00
Sn12 Sn  0.87938  0.38041  0.38810  0.01267  Uiso  1.00
```

|      |    |         |         |         |         |      |      |
|------|----|---------|---------|---------|---------|------|------|
| Br13 | Br | 0.25000 | 0.12500 | 0.03038 | 0.01267 | Uiso | 1.00 |
| Br14 | Br | 0.75000 | 0.37500 | 0.03038 | 0.01267 | Uiso | 1.00 |
| Br15 | Br | 0.25000 | 0.37500 | 0.03038 | 0.01267 | Uiso | 1.00 |
| Br16 | Br | 0.75000 | 0.12500 | 0.03038 | 0.01267 | Uiso | 1.00 |
| Br17 | Br | 0.23408 | 0.12518 | 0.19553 | 0.01267 | Uiso | 1.00 |
| Br18 | Br | 0.73408 | 0.37518 | 0.19553 | 0.01267 | Uiso | 1.00 |
| Br19 | Br | 0.23349 | 0.36877 | 0.19671 | 0.01267 | Uiso | 1.00 |
| Br20 | Br | 0.73349 | 0.11877 | 0.19671 | 0.01267 | Uiso | 1.00 |
| Br21 | Br | 0.98456 | 0.24925 | 0.11493 | 0.01267 | Uiso | 1.00 |
| Br22 | Br | 0.48456 | 0.49925 | 0.11493 | 0.01267 | Uiso | 1.00 |
| Cs23 | Cs | 0.99761 | 0.49939 | 0.10840 | 0.01267 | Uiso | 1.00 |
| Cs24 | Cs | 0.49761 | 0.24939 | 0.10840 | 0.01267 | Uiso | 1.00 |
| S25  | S  | 0.38234 | 0.11817 | 0.30984 | 0.01267 | Uiso | 1.00 |
| S26  | S  | 0.37640 | 0.36626 | 0.31004 | 0.01267 | Uiso | 1.00 |
| S27  | S  | 0.87640 | 0.11626 | 0.31004 | 0.01267 | Uiso | 1.00 |
| S28  | S  | 0.88234 | 0.36817 | 0.30984 | 0.01267 | Uiso | 1.00 |
| S29  | S  | 0.13032 | 0.49215 | 0.37947 | 0.01267 | Uiso | 1.00 |
| S30  | S  | 0.12855 | 0.24053 | 0.37840 | 0.01267 | Uiso | 1.00 |
| S31  | S  | 0.62854 | 0.49053 | 0.37840 | 0.01267 | Uiso | 1.00 |
| S32  | S  | 0.63032 | 0.24215 | 0.37947 | 0.01267 | Uiso | 1.00 |
| Sn33 | Sn | 0.00000 | 0.75000 | 0.03038 | 0.01267 | Uiso | 1.00 |
| Sn34 | Sn | 0.50000 | 0.50000 | 0.03038 | 0.01267 | Uiso | 1.00 |
| Sn35 | Sn | 0.01385 | 0.74550 | 0.20385 | 0.01267 | Uiso | 1.00 |
| Sn36 | Sn | 0.51385 | 0.99550 | 0.20385 | 0.01267 | Uiso | 1.00 |
| Sn37 | Sn | 0.13015 | 0.50459 | 0.30019 | 0.01267 | Uiso | 1.00 |
| Sn38 | Sn | 0.13370 | 0.76059 | 0.30081 | 0.01267 | Uiso | 1.00 |
| Sn39 | Sn | 0.63370 | 0.51059 | 0.30081 | 0.01267 | Uiso | 1.00 |
| Sn40 | Sn | 0.63015 | 0.75459 | 0.30019 | 0.01267 | Uiso | 1.00 |
| Sn41 | Sn | 0.37938 | 0.63041 | 0.38810 | 0.01267 | Uiso | 1.00 |
| Sn42 | Sn | 0.37663 | 0.88034 | 0.38846 | 0.01267 | Uiso | 1.00 |
| Sn43 | Sn | 0.87663 | 0.63034 | 0.38846 | 0.01267 | Uiso | 1.00 |
| Sn44 | Sn | 0.87938 | 0.88041 | 0.38810 | 0.01267 | Uiso | 1.00 |
| Br45 | Br | 0.25000 | 0.62500 | 0.03038 | 0.01267 | Uiso | 1.00 |
| Br46 | Br | 0.75000 | 0.87500 | 0.03038 | 0.01267 | Uiso | 1.00 |
| Br47 | Br | 0.25000 | 0.87500 | 0.03038 | 0.01267 | Uiso | 1.00 |
| Br48 | Br | 0.75000 | 0.62500 | 0.03038 | 0.01267 | Uiso | 1.00 |
| Br49 | Br | 0.23408 | 0.62518 | 0.19553 | 0.01267 | Uiso | 1.00 |
| Br50 | Br | 0.73408 | 0.87518 | 0.19553 | 0.01267 | Uiso | 1.00 |
| Br51 | Br | 0.23349 | 0.86877 | 0.19671 | 0.01267 | Uiso | 1.00 |
| Br52 | Br | 0.73349 | 0.61877 | 0.19671 | 0.01267 | Uiso | 1.00 |
| Br53 | Br | 0.98456 | 0.74925 | 0.11493 | 0.01267 | Uiso | 1.00 |
| Br54 | Br | 0.48456 | 0.99925 | 0.11493 | 0.01267 | Uiso | 1.00 |
| Cs55 | Cs | 0.99761 | 0.99938 | 0.10840 | 0.01267 | Uiso | 1.00 |
| Cs56 | Cs | 0.49761 | 0.74938 | 0.10840 | 0.01267 | Uiso | 1.00 |

|     |   |         |         |         |         |      |      |
|-----|---|---------|---------|---------|---------|------|------|
| S57 | S | 0.38234 | 0.61817 | 0.30984 | 0.01267 | Uiso | 1.00 |
| S58 | S | 0.37640 | 0.86626 | 0.31004 | 0.01267 | Uiso | 1.00 |
| S59 | S | 0.87640 | 0.61626 | 0.31004 | 0.01267 | Uiso | 1.00 |
| S60 | S | 0.88234 | 0.86817 | 0.30984 | 0.01267 | Uiso | 1.00 |
| S61 | S | 0.13032 | 0.99215 | 0.37947 | 0.01267 | Uiso | 1.00 |
| S62 | S | 0.12855 | 0.74053 | 0.37840 | 0.01267 | Uiso | 1.00 |
| S63 | S | 0.62854 | 0.99053 | 0.37840 | 0.01267 | Uiso | 1.00 |
| S64 | S | 0.63032 | 0.74215 | 0.37947 | 0.01267 | Uiso | 1.00 |

### CsSnBr<sub>3</sub>/SnS<sub>2</sub> heterostructure CIF

|                                |    |                    |         |         |         |      |      |
|--------------------------------|----|--------------------|---------|---------|---------|------|------|
| data_CsSnBr3SnS2               |    |                    |         |         |         |      |      |
| _audit_creation_date           |    | 2024-08-27         |         |         |         |      |      |
| _audit_creation_method         |    | 'Materials Studio' |         |         |         |      |      |
| _symmetry_space_group_name_H-M |    | 'P1'               |         |         |         |      |      |
| _symmetry_Int_Tables_number    |    | 1                  |         |         |         |      |      |
| _symmetry_cell_setting         |    | triclinic          |         |         |         |      |      |
| loop_                          |    |                    |         |         |         |      |      |
| _symmetry_equiv_pos_as_xyz     |    | x,y,z              |         |         |         |      |      |
| _cell_length_a                 |    | 6.2440             |         |         |         |      |      |
| _cell_length_b                 |    | 18.0250            |         |         |         |      |      |
| _cell_length_c                 |    | 30.2615            |         |         |         |      |      |
| _cell_angle_alpha              |    | 90.0000            |         |         |         |      |      |
| _cell_angle_beta               |    | 90.0000            |         |         |         |      |      |
| _cell_angle_gamma              |    | 90.0000            |         |         |         |      |      |
| loop_                          |    |                    |         |         |         |      |      |
| _atom_site_label               |    |                    |         |         |         |      |      |
| _atom_site_type_symbol         |    |                    |         |         |         |      |      |
| _atom_site_fract_x             |    |                    |         |         |         |      |      |
| _atom_site_fract_y             |    |                    |         |         |         |      |      |
| _atom_site_fract_z             |    |                    |         |         |         |      |      |
| _atom_site_U_iso_or_equiv      |    |                    |         |         |         |      |      |
| _atom_site_adp_type            |    |                    |         |         |         |      |      |
| _atom_site_occupancy           |    |                    |         |         |         |      |      |
| Cs1                            | Cs | 0.00000            | 0.00000 | 0.12115 | 0.01267 | Uiso | 1.00 |
| Cs2                            | Cs | 0.00000            | 0.33333 | 0.12115 | 0.01267 | Uiso | 1.00 |
| Cs3                            | Cs | 0.00000            | 0.66667 | 0.12115 | 0.01267 | Uiso | 1.00 |
| Sn4                            | Sn | 0.50000            | 0.16667 | 0.03305 | 0.01267 | Uiso | 1.00 |
| Sn5                            | Sn | 0.50000            | 0.50000 | 0.03305 | 0.01267 | Uiso | 1.00 |
| Sn6                            | Sn | 0.50000            | 0.83333 | 0.03305 | 0.01267 | Uiso | 1.00 |
| Sn7                            | Sn | 0.50000            | 0.16667 | 0.20925 | 0.01267 | Uiso | 1.00 |
| Sn8                            | Sn | 0.50000            | 0.50000 | 0.20925 | 0.01267 | Uiso | 1.00 |

|      |    |         |         |         |         |      |      |
|------|----|---------|---------|---------|---------|------|------|
| Sn9  | Sn | 0.50000 | 0.83333 | 0.20925 | 0.01267 | Uiso | 1.00 |
| Br10 | Br | 0.00000 | 0.16667 | 0.03305 | 0.01267 | Uiso | 1.00 |
| Br11 | Br | 0.00000 | 0.50000 | 0.03305 | 0.01267 | Uiso | 1.00 |
| Br12 | Br | 0.00000 | 0.83333 | 0.03305 | 0.01267 | Uiso | 1.00 |
| Br13 | Br | 0.00000 | 0.16667 | 0.20925 | 0.01267 | Uiso | 1.00 |
| Br14 | Br | 0.00000 | 0.50000 | 0.20925 | 0.01267 | Uiso | 1.00 |
| Br15 | Br | 0.00000 | 0.83333 | 0.20925 | 0.01267 | Uiso | 1.00 |
| Br16 | Br | 0.50000 | 0.00000 | 0.03305 | 0.01267 | Uiso | 1.00 |
| Br17 | Br | 0.50000 | 0.33333 | 0.03305 | 0.01267 | Uiso | 1.00 |
| Br18 | Br | 0.50000 | 0.66667 | 0.03305 | 0.01267 | Uiso | 1.00 |
| Br19 | Br | 0.50000 | 0.00000 | 0.20925 | 0.01267 | Uiso | 1.00 |
| Br20 | Br | 0.50000 | 0.33333 | 0.20925 | 0.01267 | Uiso | 1.00 |
| Br21 | Br | 0.50000 | 0.66667 | 0.20925 | 0.01267 | Uiso | 1.00 |
| Br22 | Br | 0.50000 | 0.16667 | 0.12115 | 0.01267 | Uiso | 1.00 |
| Br23 | Br | 0.50000 | 0.50000 | 0.12115 | 0.01267 | Uiso | 1.00 |
| Br24 | Br | 0.50000 | 0.83333 | 0.12115 | 0.01267 | Uiso | 1.00 |
| S25  | S  | 0.68351 | 0.00362 | 0.30855 | 0.02660 | Uiso | 1.00 |
| S26  | S  | 0.18351 | 0.10362 | 0.30855 | 0.02660 | Uiso | 1.00 |
| S27  | S  | 0.68351 | 0.20362 | 0.30855 | 0.02660 | Uiso | 1.00 |
| S28  | S  | 0.18351 | 0.30362 | 0.30855 | 0.02660 | Uiso | 1.00 |
| S29  | S  | 0.68351 | 0.40362 | 0.30855 | 0.02660 | Uiso | 1.00 |
| S30  | S  | 0.18351 | 0.50362 | 0.30855 | 0.02660 | Uiso | 1.00 |
| S31  | S  | 0.68351 | 0.60362 | 0.30855 | 0.02660 | Uiso | 1.00 |
| S32  | S  | 0.18351 | 0.70362 | 0.30855 | 0.02660 | Uiso | 1.00 |
| S33  | S  | 0.68351 | 0.80362 | 0.30855 | 0.02660 | Uiso | 1.00 |
| S34  | S  | 0.18351 | 0.90362 | 0.30855 | 0.02660 | Uiso | 1.00 |
| Sn35 | Sn | 0.01684 | 0.00362 | 0.35745 | 0.02406 | Uiso | 1.00 |
| Sn36 | Sn | 0.51684 | 0.10362 | 0.35745 | 0.02406 | Uiso | 1.00 |
| Sn37 | Sn | 0.01684 | 0.20362 | 0.35745 | 0.02406 | Uiso | 1.00 |
| Sn38 | Sn | 0.51684 | 0.30362 | 0.35745 | 0.02406 | Uiso | 1.00 |
| Sn39 | Sn | 0.01684 | 0.40362 | 0.35745 | 0.02406 | Uiso | 1.00 |
| Sn40 | Sn | 0.51684 | 0.50362 | 0.35745 | 0.02406 | Uiso | 1.00 |
| Sn41 | Sn | 0.01684 | 0.60362 | 0.35745 | 0.02406 | Uiso | 1.00 |
| Sn42 | Sn | 0.51684 | 0.70362 | 0.35745 | 0.02406 | Uiso | 1.00 |
| Sn43 | Sn | 0.01684 | 0.80362 | 0.35745 | 0.02406 | Uiso | 1.00 |
| Sn44 | Sn | 0.51684 | 0.90362 | 0.35745 | 0.02406 | Uiso | 1.00 |
| S45  | S  | 0.35017 | 0.00362 | 0.40634 | 0.02660 | Uiso | 1.00 |
| S46  | S  | 0.85017 | 0.10362 | 0.40634 | 0.02660 | Uiso | 1.00 |
| S47  | S  | 0.35017 | 0.20362 | 0.40634 | 0.02660 | Uiso | 1.00 |
| S48  | S  | 0.85017 | 0.30362 | 0.40634 | 0.02660 | Uiso | 1.00 |
| S49  | S  | 0.35017 | 0.40362 | 0.40634 | 0.02660 | Uiso | 1.00 |
| S50  | S  | 0.85017 | 0.50362 | 0.40634 | 0.02660 | Uiso | 1.00 |
| S51  | S  | 0.35017 | 0.60362 | 0.40634 | 0.02660 | Uiso | 1.00 |
| S52  | S  | 0.85017 | 0.70362 | 0.40634 | 0.02660 | Uiso | 1.00 |

|     |   |         |         |         |         |      |      |
|-----|---|---------|---------|---------|---------|------|------|
| S53 | S | 0.35017 | 0.80362 | 0.40634 | 0.02660 | Uiso | 1.00 |
| S54 | S | 0.85017 | 0.90362 | 0.40634 | 0.02660 | Uiso | 1.00 |

## References

- 1 B.H. Li, R.Y. Long, Y. Xia, and Q.X. Mi. *Angew. Chem. Int. Ed.* 2018, **57**, 13154-13158.
- 2 D. Jain, G. Jain, A. Pal, S. Agarwal, and S. Kumar. *Thin Solid Films* 2023, **780**, 139973-139979.
- 3 F. Azri, A. Meftah, N. Sengouga, and A. Meftah. *Sol. Energy* 2019, **181**, 372-378.
- 4 Y.H. Khattak, F. Baig, A. Shuja, S. Beg, and B.M. Soucase. *Sol. Energy* 2020, **207**, 579-591.
- 5 K. Decock, S. Khelifi, and M. Burgelman. *Thin Solid Films* 2011, **519**, 7481-7484.
- 6 S.A. Dar and B.S. Sengar. *Energy fuels* 2024, **38**, 8229-8248.
- 7 M.T. Islam and A.K. Thakur. *Phys. Scr.* 2023, **98**, 105950-105971.
- 8 A. Ghosh, M.F.I. Bwian, F. Ahmed, A.A. Miazee, A. Nandi, and M.A. Azad. *J. Opt.*  
<https://doi.org/10.1007/s12596-024-01800-6>
